# Supplementary material for: Open Targets Platform: supporting systematic drug–target identification and prioritisation
Source: PubMed Central journal article supplement (PMC7779013; doi:10.1093/nar/gkaa1027), 2020-11-16
Supplement: gkaa1027_supplemental_file.pdf [file gkaa1027_supplemental_file.pdf]

# Open Targets Platform: supporting systematic drug-target identification and prioritisation

## Supplemental

### AUTHOR LIST

David Ochoa<sup>1,2,\*</sup>, Andrew Hercules<sup>1,2</sup>, Miguel Carmona<sup>1,2</sup>, Daniel Suveges<sup>1,2</sup>, Asier Gonzalez-Uriarte<sup>1,2</sup>, Cinzia Malangone<sup>1,2</sup>, Alfredo Miranda<sup>1,2</sup>, Luca Fumis<sup>1,2</sup>, Denise Carvalho-Silva<sup>1,2</sup>, Michaela Spitzer<sup>1,2</sup>, Jarrod Baker<sup>1,2</sup>, Javier Ferrer<sup>1,2</sup>, Arwa Raies<sup>1,2</sup>, Olesya Razuvayevskaya<sup>1,2</sup>, Adam Faulconbridge<sup>1,2</sup>, Eirini Petsalaki<sup>1,2</sup>, Prudence Mutowo<sup>2,3</sup>, Sandra Machlitt-Northen<sup>2,3</sup>, Gareth Peat<sup>1,2</sup>, Elaine McAuley<sup>1,2</sup>, Chuang Kee Ong<sup>1,2</sup>, Edward Mountjoy<sup>2,4</sup>, Maya Ghoussaini<sup>2,4</sup>, Andrea Pierleoni<sup>1,2</sup>, Eliseo Papa<sup>2,5</sup>, Miguel Pignatelli<sup>1,2</sup>, Gautier Koscielny<sup>2,3</sup>, Mohd Karim<sup>2,4</sup>, Jeremy Schwartzentruber<sup>2,4</sup>, David G. Hulcoop<sup>2,3</sup>, Ian Dunham<sup>1,2,4</sup>, Ellen M. McDonagh<sup>1,2,\*</sup>

<sup>1</sup> European Molecular Biology Laboratory, European Bioinformatics Institute (EMBL-EBI), Wellcome Genome Campus, Hinxton, Cambridgeshire CB10 1SD, UK

<sup>2</sup> Open Targets, Wellcome Genome Campus, Hinxton, Cambridgeshire CB10 1SD, UK

<sup>3</sup> GlaxoSmithKline plc, GSK Medicines Research Centre, Gunnels Wood Road, Stevenage, SG1 2NY, UK

<sup>4</sup> Wellcome Sanger Institute, Wellcome Genome Campus, Hinxton, Cambridgeshire CB10 1SA, UK

<sup>5</sup> Systems Biology, Biogen, Cambridge, MA, 02142, USA

\* To whom correspondence should be addressed. Tel: 01223 494330. Email: emcdonagh@ebi.ac.uk. Present Address: Open Targets and European Molecular Biology Laboratory - European Bioinformatics Institute (EMBL-EBI), Wellcome Genome Campus, Hinxton, Cambridgeshire CB10 1SD, UK. Correspondence may also be addressed to David Ochoa, Tel: 01223 494330. Email: ochoa@ebi.ac.uk. Present Address: Open Targets and European Molecular Biology Laboratory - European Bioinformatics Institute (EMBL-EBI), Wellcome Genome Campus, Hinxton, Cambridgeshire CB10 1SD, UK.

## Contents

|                                                                                                          |    |
|----------------------------------------------------------------------------------------------------------|----|
| Supplementary Figure 1: Evidence strings added per Open Targets release from each resource               | 3  |
| Supplementary Table 1: Entities within the Open Targets Platform                                         | 4  |
| Supplementary Table 2: Data sources used in the Open Targets Platform and weight for scoring of evidence | 6  |
| Supplementary Table 3: Github repositories                                                               | 9  |
| Supplementary Table 4: Availability / Outreach Activities links                                          | 11 |
| References                                                                                               | 12 |

## Supplementary Figure 1: Evidence strings added per Open Targets release from each resource

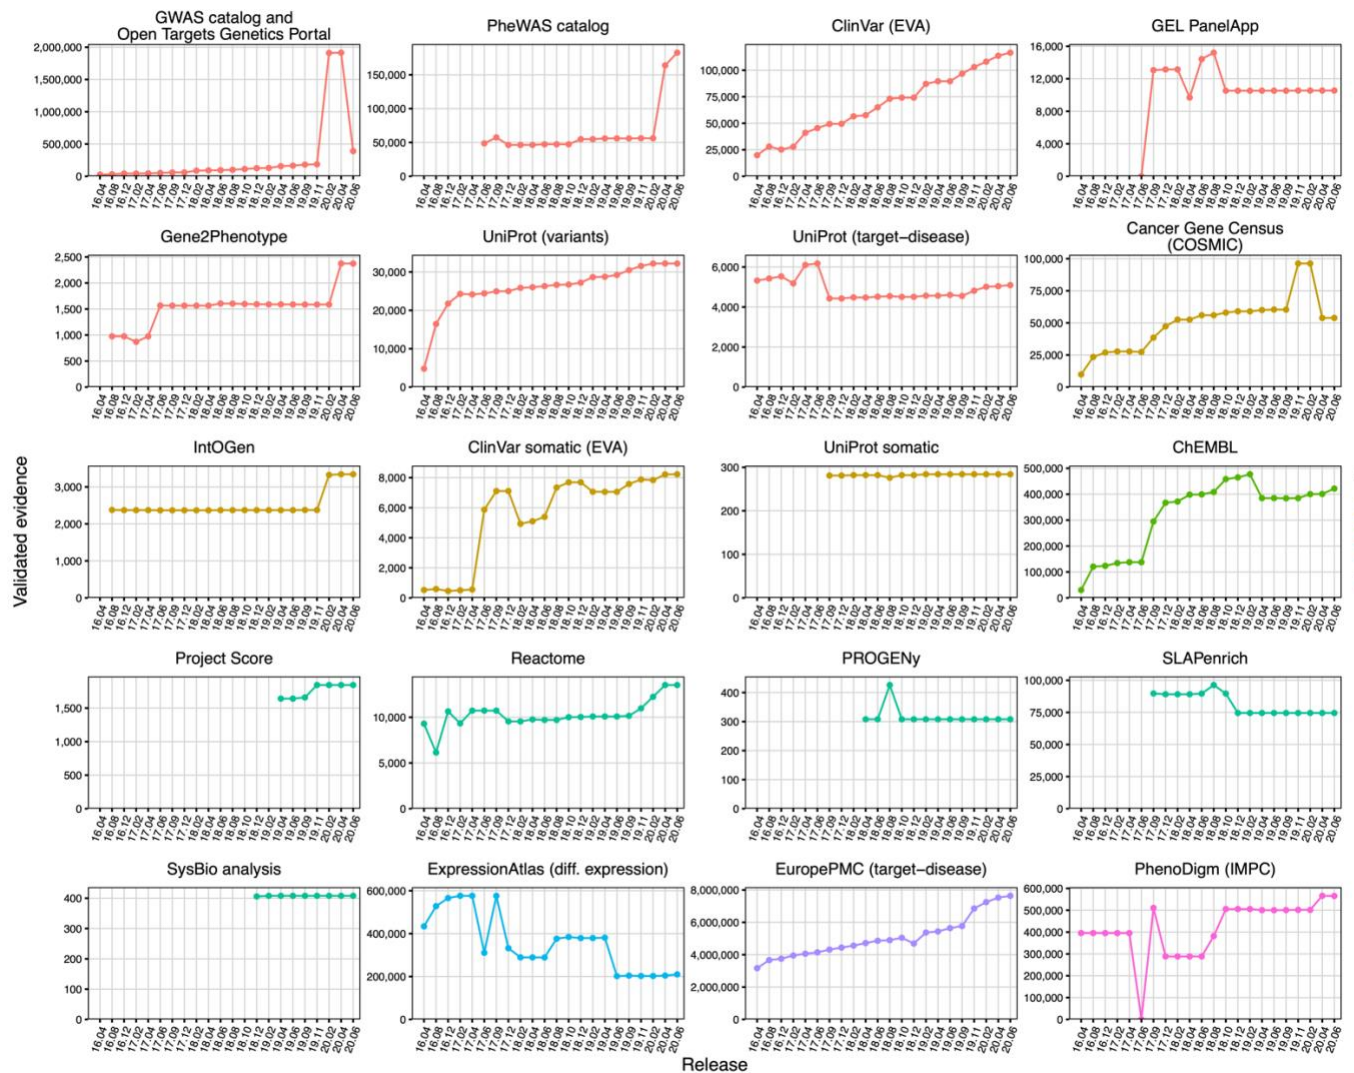

### Data type

- ◆ Genetic associations
- ◆ Somatic mutations
- ◆ Known drugs
- ◆ Pathways & SysBio
- ◆ RNA expression
- ◆ Literature mining
- ◆ Animal models

**Supplementary Figure 1:** The number of validated evidence strings integrated into each data release of the Open Target Targets Platform, for each data resource used for target-drug evidence generation.

**Supplementary Table 1: Entities within the Open Targets Platform**

| Entity  | Annotation                                                                                       | Source                               |
|---------|--------------------------------------------------------------------------------------------------|--------------------------------------|
| Target  | Protein Information<br>Functional annotation<br>Positional information<br>Structural information | Uniprot                              |
| Target  | Protein Interactions                                                                             | OmniPath DB                          |
| Target  | Pathways                                                                                         | Reactome                             |
| Target  | Baseline expression                                                                              | Expression Atlas, GTEX, HPA          |
| Target  | Variants, Isoforms and Genomic Context                                                           | Ensembl                              |
| Target  | Comparative genomics                                                                             | Ensembl Compara                      |
| Target  | Mouse Phenotypes                                                                                 | MGI                                  |
| Target  | Cancer Hallmarks                                                                                 | Cosmic / Cancer Gene Census          |
| Target  | Cancer Biomarkers                                                                                | Cancer Genome Interpreter            |
| Target  | Chemical Probes                                                                                  | SGC, CP Portal, OS Probes            |
| Target  | Chemical Probes (predicted)                                                                      | Probe Miner                          |
| Target  | Bibliography                                                                                     | EuropePMC / LINK                     |
| Target  | Target tractability                                                                              | ChEMBL and others                    |
| Target  | Target safety                                                                                    | HeCaTos, Tox21, eTOX and others      |
| Target  | Target Enabling Packages                                                                         | SGC                                  |
| Target  | Drugs                                                                                            | ChEMBL, DailyMed, clinicaltrials.gov |
| Target  | CRISPR-Cas9 cancer cell line dependency                                                          | Project Score                        |
| Target  | Protein Structure                                                                                | PDBe                                 |
| Target  | Gene Ontology                                                                                    | UniProt                              |
| Drug    | Molecule information<br>Structure<br>Modality<br>Withdrawal<br>Mechanism of action               | ChEMBL                               |
| Drug    | Clinical Trial Information                                                                       | Clinicaltrials.gov, DailyMed         |
| Drug    | Bibliography                                                                                     | EuropePMC / LINK                     |
| Drug    | Pharmacovigilance                                                                                | openFDA/FAERS                        |
| Disease | Ontology<br>- Cross-references<br>- Synonyms<br>- Classification                                 | EFO                                  |

|         |              |                                      |
|---------|--------------|--------------------------------------|
| Disease | Phenotypes   | EFO                                  |
| Disease | Bibliography | EuropePMC / LINK                     |
| Disease | Drugs        | ChEMBL, DailyMed, clinicaltrials.gov |

**Supplementary Table 2: Data sources used in the Open Targets Platform and weight for scoring of evidence**

| Data source               | Score description                                                                                                                                                                                                                 | Weight factor | Source URL                                                                                                                                                                                     | Source Reference (if available) |
|---------------------------|-----------------------------------------------------------------------------------------------------------------------------------------------------------------------------------------------------------------------------------|---------------|------------------------------------------------------------------------------------------------------------------------------------------------------------------------------------------------|---------------------------------|
| OT Genetics Portal        | Locus 2 gene (L2G) score, lower threshold: 0.05                                                                                                                                                                                   | 1             | <a href="https://genetics.opentargets.org/">https://genetics.opentargets.org/</a>                                                                                                              |                                 |
| PheWAS Catalog            | Functional consequence score of variants, normalised p-value and normalised sample size                                                                                                                                           | 1             | <a href="https://phewascatalog.org/">https://phewascatalog.org/</a>                                                                                                                            | 1                               |
| EVA                       | Functional consequence score of variants e.g. germline variants that cause transcript ablation will have a score of 1, whereas variants that are intronic will have a score of 0.5                                                | 1             | EVA:<br><a href="https://www.ebi.ac.uk/eva/?Home">https://www.ebi.ac.uk/eva/?Home</a><br>ClinVar:<br><a href="https://www.ncbi.nlm.nih.gov/clinvar/">https://www.ncbi.nlm.nih.gov/clinvar/</a> | 2,3                             |
| Genomics England PanelApp | Gene-disease associations are curated and crowdsourced by experts and will have the highest score of 1                                                                                                                            | 1             | <a href="https://panelapp.genomicsengland.co.uk/">https://panelapp.genomicsengland.co.uk/</a>                                                                                                  | 4                               |
| Gene2Phenotype            | Gene-disease associations are inferred by curators and will have a score of 1, the highest functional consequence score                                                                                                           | 1             | <a href="https://www.ebi.ac.uk/gene2phenotype">https://www.ebi.ac.uk/gene2phenotype</a>                                                                                                        | 5                               |
| Uniprot Literature        | Curator inference score based on how strong the evidence for the gene's involvement in the disease is. If the evidence is strong, the score will be 1. For evidence deemed not to be strong by the curator, the score will be 0.5 | 1             | <a href="https://www.uniprot.org/">https://www.uniprot.org/</a>                                                                                                                                | 6                               |
| Uniprot                   | Functional consequence score of variants e.g. germline variants that cause transcript ablation will have a score of 1, whereas variants that are intronic will have a score of 0.5                                                | 1             | <a href="https://www.uniprot.org/">https://www.uniprot.org/</a>                                                                                                                                | 6                               |

|                    |                                                                                                                                                                                                                                                                                                         |     |                                                                                           |    |
|--------------------|---------------------------------------------------------------------------------------------------------------------------------------------------------------------------------------------------------------------------------------------------------------------------------------------------------|-----|-------------------------------------------------------------------------------------------|----|
| ChEMBL             | Clinical trials phase binned score. Scores will be 0.09 for phase 0, 0.1 for phase I, 0.2 for Phase II, 0.7 for Phase III, and 1 for Phase IV drugs                                                                                                                                                     | 1   | <a href="https://www.ebi.ac.uk/chembl/">https://www.ebi.ac.uk/chembl/</a>                 | 7  |
| Reactome           | Functional consequence of 1 for a pathway inferred by a curator                                                                                                                                                                                                                                         | 1   | <a href="https://reactome.org/">https://reactome.org/</a>                                 | 8  |
| CRISPR             | CRISPR evidence is scored as per the priority score described by Behan et al. 2019 (this originally varies from 0 to 100 and is available in Table 6 as supplementary information; any value above 40 is significant) divided by 100                                                                    | 1   | <a href="https://score.depmap.sanger.ac.uk/">https://score.depmap.sanger.ac.uk/</a>       | 9  |
| SLAPenrich         | Scored according to Iorio F et al 2018, followed by quantifying, in large cohorts of cancer patients, the divergence of the total number of samples with genomic alterations in pathway from its expectation, accounting for mutational burdens and total exonic block lengths of genes in that pathway | 0.5 | <a href="https://saezlab.github.io/SLAPenrich/">https://saezlab.github.io/SLAPenrich/</a> | 10 |
| SysBio             | p-values or rank-based scores are used for scoring if provided, otherwise a score of 0.5 is assigned                                                                                                                                                                                                    | 0.5 | NA                                                                                        | NA |
| PROGENy            | Scored per sample and pathway following a modification of the original implementation described in the reference.                                                                                                                                                                                       | 0.5 | <a href="https://saezlab.github.io/progeny/">https://saezlab.github.io/progeny/</a>       | 11 |
| Expression Atlas   | Normalised p-value, normalised expression fold change and normalised percentile rank                                                                                                                                                                                                                    | 0.2 | <a href="https://www.ebi.ac.uk/gxa/home">https://www.ebi.ac.uk/gxa/home</a>               | 12 |
| Cancer Gene Census | Base score of 0.5 modified as follows: -0.25 if only 1 mutated sample, +0.25 if gene Tier 1 and mutated more frequently in particular disease compared to all other diseases and +0.25 if gene Tier 1 and mutations occur more frequently than in other genes of similar length in the same disease     | 1   | <a href="https://cancer.sanger.ac.uk/census">https://cancer.sanger.ac.uk/census</a>       | 13 |
| intOGen            | Combined q-value of driver identification methods                                                                                                                                                                                                                                                       | 1   | <a href="http://www.intogen.org/search">www.intogen.org/search</a>                        | 14 |
| Uniprot somatic    | Curator inference score based on how strong the evidence for the gene's involvement in the disease is. If the evidence is strong, the score will be 1. For evidence deemed not to be strong by the curator, the score will be 0.5                                                                       | 1   | <a href="https://www.uniprot.org/">https://www.uniprot.org/</a>                           | 6  |

|             |                                                                                                                                                                                    |     |                                                                                                                                                                                                |       |
|-------------|------------------------------------------------------------------------------------------------------------------------------------------------------------------------------------|-----|------------------------------------------------------------------------------------------------------------------------------------------------------------------------------------------------|-------|
| EVA somatic | Functional consequence score of variants e.g. germline variants that cause transcript ablation will have a score of 1, whereas variants that are intronic will have a score of 0.5 | 1   | EVA:<br><a href="https://www.ebi.ac.uk/eva/?Home">https://www.ebi.ac.uk/eva/?Home</a><br>ClinVar:<br><a href="https://www.ncbi.nlm.nih.gov/clinvar/">https://www.ncbi.nlm.nih.gov/clinvar/</a> | 2,3   |
| Europe PMC  | Weighted document sections, sentence locations and title for full text articles and abstracts                                                                                      | 0.2 | <a href="http://europepmc.org/">http://europepmc.org/</a>                                                                                                                                      | 15,16 |
| PhenoDigm   | Similarity score between a mouse model and a human disease described in the reference                                                                                              | 0.2 | <a href="https://www.sanger.ac.uk/tool/pheno-digm/">https://www.sanger.ac.uk/tool/pheno-digm/</a>                                                                                              | 17    |



**Supplementary Table 3: Github repositories**

| <b>a) Evidence file generation</b>                                                             |                                                                                                                                                                                                                                                                                                                                                                                                                   |
|------------------------------------------------------------------------------------------------|-------------------------------------------------------------------------------------------------------------------------------------------------------------------------------------------------------------------------------------------------------------------------------------------------------------------------------------------------------------------------------------------------------------------|
| Repository <a href="https://github.com/opentargets/...">https://github.com/opentargets/...</a> | Description                                                                                                                                                                                                                                                                                                                                                                                                       |
| evidence_datasource_parsers                                                                    | Python scripts to generate evidence strings from csv or text files for: <ul style="list-style-type: none"> <li>- Project Score (aka CRISPR)</li> <li>- Gene2Phenotype</li> <li>- OT Genetics Portal</li> <li>- Genomics England Panel App</li> <li>- IntOGen</li> <li>- IMPC/PhenoDigm (aka MouseModels)</li> <li>- PROGENy</li> <li>- PheWAS catalog</li> <li>- SLAPenrich</li> <li>- Systems Biology</li> </ul> |
| <b>b) Data ingest and analysis</b>                                                             |                                                                                                                                                                                                                                                                                                                                                                                                                   |
| Repository <a href="https://github.com/opentargets/...">https://github.com/opentargets/...</a> | Description                                                                                                                                                                                                                                                                                                                                                                                                       |
| platform-input-support                                                                         | Application that ensures reproducibility of data release by copying input files into a specific google storage bucket and generating a YAML config file used to run the pipeline                                                                                                                                                                                                                                  |
| data_pipeline                                                                                  | ExtractTransform-Load (ETL) pipeline that processes all the data files and generates the elasticsearch indices used by the web app                                                                                                                                                                                                                                                                                |
| library-beam                                                                                   | ETL pipeline for NLP analysis of Medline and PubMed to annotate publications of targets and diseases                                                                                                                                                                                                                                                                                                              |
| <b>c) Infrastructure, API and web application</b>                                              |                                                                                                                                                                                                                                                                                                                                                                                                                   |
| Repository <a href="https://github.com/opentargets/...">https://github.com/opentargets/...</a> | Description                                                                                                                                                                                                                                                                                                                                                                                                       |
| webapp                                                                                         | Angular.js web application                                                                                                                                                                                                                                                                                                                                                                                        |
| rest_api                                                                                       | Flask REST API for Open Targets Platform                                                                                                                                                                                                                                                                                                                                                                          |

|                                                                                                                                 |                                                                                                                                                |
|---------------------------------------------------------------------------------------------------------------------------------|------------------------------------------------------------------------------------------------------------------------------------------------|
| library-api                                                                                                                     | REST API to serve data generated by Open Targets Library                                                                                       |
| <b>d) Other</b>                                                                                                                 |                                                                                                                                                |
| Repository <a href="https://github.com/opentargets/...">https://github.com/opentargets/...</a>                                  | Description                                                                                                                                    |
| json_schema                                                                                                                     | JSON schema for evidence files                                                                                                                 |
| validator                                                                                                                       | Python evidence file validator                                                                                                                 |
| opentargets-py                                                                                                                  | Python client for the Open Targets REST API                                                                                                    |
| expression_analysis                                                                                                             | The rna_expression_analysis_with_blueprint2.ipynb notebook contains the python code used to process the baseline expression meta-analysis file |
| <b>e) External repositories</b>                                                                                                 |                                                                                                                                                |
| URL                                                                                                                             | Description                                                                                                                                    |
| <a href="https://github.com/EBIvariation/eva-opentargets">https://github.com/EBIvariation/eva-opentargets</a>                   | EVA pipeline to generate evidence from ClinVar dumps                                                                                           |
| <a href="https://github.com/EBISPOT/efo">https://github.com/EBISPOT/efo</a>                                                     | Experimental Factor Ontology                                                                                                                   |
| <a href="https://github.com/ebi-uniprot/open-targets-core-db">https://github.com/ebi-uniprot/open-targets-core-db</a>           | UniProt pipeline to generate evidence                                                                                                          |
| <a href="https://github.com/reactome/data-export">https://github.com/reactome/data-export</a>                                   | Module to export files based on queries to the Reactome Graph database                                                                         |
| <a href="https://github.com/suhaibMo/BaselineMetaAnalysis">https://github.com/suhaibMo/BaselineMetaAnalysis</a>                 | Scripts to perform meta-analysis of several baseline expression datasets                                                                       |
| <a href="https://github.com/melschneider/tractability_pipeline_v2">https://github.com/melschneider/tractability_pipeline_v2</a> | Pipeline that generates small molecule, antibody, and other modality tractability assessments                                                  |

**Supplementary Table 4: Availability / Outreach Activities links**

| URL                                                                                                                                                     | Description                                                                                                                                                 |
|---------------------------------------------------------------------------------------------------------------------------------------------------------|-------------------------------------------------------------------------------------------------------------------------------------------------------------|
| <a href="http://blog.opentargets.org/">http://blog.opentargets.org/</a>                                                                                 | The Open Targets blog, which includes release posts and in-depth articles on technical and scientific aspects of the Platform and Open Targets more broadly |
| <a href="https://www.targetvalidation.org/outreach">https://www.targetvalidation.org/outreach</a>                                                       | Listing of all previous and upcoming Open Targets Platform training workshops and webinars                                                                  |
| <a href="https://docs.targetvalidation.org/">https://docs.targetvalidation.org/</a>                                                                     | Homepage for all Open Targets Platform documentation                                                                                                        |
| <a href="https://docs.targetvalidation.org/programmatic-access/rest-api">https://docs.targetvalidation.org/programmatic-access/rest-api</a>             | REST API documentation                                                                                                                                      |
| <a href="https://opentargets.readthedocs.io/en/stable/">https://opentargets.readthedocs.io/en/stable/</a>                                               | Python client documentation                                                                                                                                 |
| <a href="https://www.targetvalidation.org/downloads/data">https://www.targetvalidation.org/downloads/data</a>                                           | Page with links to all data files available for download using Google Cloud storage                                                                         |
| <a href="ftp://ftp.ebi.ac.uk/pub/databases/opentargets/platform/">ftp://ftp.ebi.ac.uk/pub/databases/opentargets/platform/</a>                           | EMBL-EBI FTP service that hosts the input and output files                                                                                                  |
| <a href="https://docs.targetvalidation.org/release-notes">https://docs.targetvalidation.org/release-notes</a>                                           | Release notes for each release                                                                                                                              |
| <a href="https://docs.targetvalidation.org/technical-pipeline/technical-notes">https://docs.targetvalidation.org/technical-pipeline/technical-notes</a> | Technical notes for each release                                                                                                                            |
| <a href="https://github.com/opentargets">https://github.com/opentargets</a>                                                                             | Open Targets GitHub organisation page listing all repositories                                                                                              |

## References

1. Denny, J. C. *et al.* Systematic comparison of phenome-wide association study of electronic medical record data and genome-wide association study data. *Nat. Biotechnol.* **31**, 1102–1110 (2013).
2. Cook, C. E. *et al.* The European Bioinformatics Institute in 2016: Data growth and integration. *Nucleic Acids Res.* **44**, D20–26 (2016).
3. Landrum, M. J. *et al.* ClinVar: improving access to variant interpretations and supporting evidence. *Nucleic Acids Res.* **46**, D1062–D1067 (2018).
4. Martin, A. R. *et al.* PanelApp crowdsources expert knowledge to establish consensus diagnostic gene panels. *Nat. Genet.* **51**, 1560–1565 (2019).
5. Thormann, A. *et al.* Flexible and scalable diagnostic filtering of genomic variants using G2P with Ensembl VEP. *Nat. Commun.* **10**, 2373 (2019).
6. UniProt Consortium. UniProt: a worldwide hub of protein knowledge. *Nucleic Acids Res.* **47**, D506–D515 (2019).
7. Mendez, D. *et al.* ChEMBL: towards direct deposition of bioassay data. *Nucleic Acids Res.* **47**, D930–D940 (2019).
8. Jassal, B. *et al.* The reactome pathway knowledgebase. *Nucleic Acids Res.* **48**, D498–D503 (2020).
9. Behan, F. M. *et al.* Prioritization of cancer therapeutic targets using CRISPR-Cas9 screens. *Nature* **568**, 511–516 (2019).
10. Iorio, F. *et al.* Pathway-based dissection of the genomic heterogeneity of cancer hallmarks' acquisition with SLAPenrich. *Sci. Rep.* **8**, 6713 (2018).
11. Schubert, M. *et al.* Perturbation-response genes reveal signaling footprints in cancer gene expression. *Nat. Commun.* **9**, 20 (2018).
12. Papatheodorou, I. *et al.* Expression Atlas update: from tissues to single cells. *Nucleic Acids Res.* **48**, D77–D83 (2020).
13. Sondka, Z. *et al.* The COSMIC Cancer Gene Census: describing genetic dysfunction across all human cancers. *Nat. Rev. Cancer* **18**, 696–705 (2018).
14. Martínez-Jiménez, F. *et al.* A compendium of mutational cancer driver genes. *Nat. Rev. Cancer* (2020) doi:10.1038/s41568-020-0290-x.
15. Europe PMC Consortium. Europe PMC: a full-text literature database for the life sciences and platform for innovation. *Nucleic Acids Res.* **43**, D1042–1048 (2015).
16. Kafkas, Ş., Dunham, I. & McEntyre, J. Literature evidence in open targets - a target validation platform. *J. Biomed. Semant.* **8**, 20 (2017).
17. Smedley, D. *et al.* PhenoDigm: analyzing curated annotations to associate animal models with human diseases. *Database J. Biol. Databases Curation* **2013**, bat025 (2013).
